# Supplementary material
Source: Research Square preprint supplement (doi:10.21203/rs.3.rs-9123726/v1)
Supplement: Supplementary file 1 [file 25db5dc8396b23ea1610a349.pdf]

| Variable                                | bleeding (n=75)    | Non-bleeding (n=115) | t/Z/ $\chi^2$ | P     |
|-----------------------------------------|--------------------|----------------------|---------------|-------|
| Urinary leukocytes, n(%)                |                    |                      | 1.927         | 0.588 |
| -                                       | 12 (16.0%)         | 23 (20.0%)           |               |       |
| 1+                                      | 37 (49.3%)         | 47 (40.9%)           |               |       |
| 2+                                      | 15 (20.0%)         | 30 (26.1%)           |               |       |
| 3+                                      | 11 (14.7%)         | 15 (13.0%)           |               |       |
| Blood                                   |                    |                      |               |       |
| platelets[M(Q1,Q3), $\times 10^9/L$ ]   | 243.97 (207,283)   | 238.78(188,278)      | -1.057        | 0.290 |
| White cell                              |                    |                      |               |       |
| count[M(Q1,Q3), $\times 10^9/L$ ]       | 6.95(5.82,8.07)    | 6.51(5.31,7.37)      | -1.549        | 0.121 |
| Neutrophils[M(Q1,Q3), $\times 10^9/L$ ] | 4.13(3.05,4.68)    | 4.04(3.08,4.86)      | -0.538        | 0.590 |
| Monocytes[M(Q1,Q3), $\times 10^9/L$ ]   | 0.46(0.34,0.57)    | 0.43(0.32,0.49)      | -1.706        | 0.088 |
| Eosinophils[M(Q1,Q3), $\times 10^9/L$ ] | 0.15(0.08,0.20)    | 0.15(0.08,0.18)      | -0.385        | 0.700 |
| Basophils[M(Q1,Q3), $\times 10^9/L$ ]   | 0.04(0.02,0.05)    | 0.035(0.02,0.04)     | -1.035        | 0.301 |
| Mean corpuscular                        |                    |                      |               |       |
| volume[M(Q1,Q3),fL]                     | 92.32(89.30,95.30) | 91.02(88.40,94.00)   | -1.853        | 0.064 |
| Mean amount of                          |                    |                      |               |       |
| hemoglobin[M(Q1,Q3),pg]                 | 30.87(29.90,32.00) | 30.29(29.50,31.50)   | -1.959        | 0.050 |
| Mean corpuscular                        |                    |                      |               |       |
| hemoglobin concentration                | 334.45 $\pm$ 9.30  | 332.52 $\pm$ 10.22   | 1.319         | 0.189 |
| (mean $\pm$ sd, g/L)                    |                    |                      |               |       |
| Red cell distribution                   |                    |                      |               |       |
| width-CV[M(Q1,Q3),%]                    | 12.96(12.40,13.40) | 13.21(12.40,13.60)   | -0.721        | 0.471 |
| Red cell distribution                   |                    |                      |               |       |
| width-SD[M(Q1,Q3),fL]                   | 43.25(41.50,44.60) | 43.48(41.10,44.80)   | -0.124        | 0.901 |
| Platelet distribution                   | 14.28(12.20,16.30) | 15.91(12.63,16.50)   | -0.942        | 0.346 |

|                                |                         |                        |        |       |
|--------------------------------|-------------------------|------------------------|--------|-------|
| width[M(Q1,Q3),%]              |                         |                        |        |       |
| Mean platelet                  |                         |                        |        |       |
| volume[M(Q1,Q3),fL]            | 10.01(9.10,10.90)       | 10.25(9.18,10.93)      | -1.016 | 0.310 |
| Specific platelet              |                         |                        |        |       |
| volume[M(Q1,Q3),%]             | 0.24(0.21,0.28)         | 0.38(0.19,0.28)        | -0.434 | 0.665 |
| Large platelet                 |                         |                        |        |       |
| ratio[M(Q1,Q3),%]              | 25.95(19.50,32.50)      | 27.22(19.80,32.23)     | -0.743 | 0.457 |
| Globulin (mean ± SD, g/L)      | 29.27±3.62              | 28.50±4.16             | 1.319  | 0.189 |
| White sphere ratio (mean ± SD) | 1.54±0.24               | 1.51±0.26              | 0.774  | 0.440 |
| Alanine aminotransferase       |                         |                        |        |       |
| [M(Q1,Q3),U/L]                 | 29.87(16,36)            | 25.50(15,30)           | -1.777 | 0.076 |
| Aspartate aminotransferase     |                         |                        |        |       |
| [M(Q1,Q3),U/L]                 | 26.87(19,30)            | 24.44(18,28)           | -1.111 | 0.267 |
| Total bilirubin                |                         |                        |        |       |
| [M(Q1,Q3),umol/L]              | 15.39(10.40,17.60)      | 14.10(9.50,17.00)      | -1.219 | 0.223 |
| Direct bilirubin               |                         |                        |        |       |
| [M(Q1,Q3),umol/L]              | 4.01(2.60,5.00)         | 4.06(2.50,4.50)        | -0.247 | 0.805 |
| Indirect bilirubin             |                         |                        |        |       |
| [M(Q1,Q3),umol/L]              | 11.38(7.40,12.90)       | 10.04(6.80,12.60)      | -1.285 | 0.199 |
| Lactate dehydrogenase          |                         |                        |        |       |
| [M(Q1,Q3),U/L]                 | 176.29(154,202)         | 179.57 ( 151,200)      | -0.382 | 0.703 |
| Prothrombin time               |                         |                        |        |       |
| [M(Q1,Q3), seconds]            | 11.15 ( 10.55,11.50)    | 11.11 ( 10.60,11.50)   | -0.26  | 0.795 |
| International normalized ratio |                         |                        |        |       |
| [M(Q1,Q3)]                     | 2.28(0.92,0.99)         | 3.96 ( 0.92,1.00)      | -0.824 | 0.41  |
| Prothrombin activity           |                         |                        |        |       |
| [M(Q1,Q3),%]                   | 107.44 ( 100.00,124.32) | 106.74 ( 98.15,121.05) | -0.517 | 0.605 |
| Prothrombin time ratio         |                         |                        |        |       |
|                                | 5.76 ( 0.92,1.00)       | 3.57 ( 0.92,0.10)      | -0.138 | 0.89  |

|                           |                      |                      |        |       |
|---------------------------|----------------------|----------------------|--------|-------|
| [M(Q1,Q3)]                |                      |                      |        |       |
| Activated partial         |                      |                      |        |       |
| thromboplastin time       | 28.79 (25.85,31.95)  | 28.84 (26.23,30.50)  | -0.205 | 0.838 |
| [M(Q1,Q3), seconds]       |                      |                      |        |       |
| Fibrinogen [M(Q1,Q3),g/L] | 3.67 (2.66,3.61)     | 3.62 (2.82,3.86)     | -1.749 | 0.08  |
| Thrombin time [M(Q1,Q3),  |                      |                      |        |       |
| seconds]                  | 16.15 (15.05,17.50)  | 16.04 (14.85, 17.30) | -1.088 | 0.277 |
| Thrombolytic dimer        |                      |                      |        |       |
| [M(Q1,Q3),ug/ml]          | 1.32 (0.17,2.50)     | 1.07 (0.24,2.50)     | -1.92  | 0.055 |
| Fibrinogen degradation    |                      |                      |        |       |
| products [M(Q1,Q3),ug/ml] | 1.58 (0.70,2.50)     | 1.85 (0.50,2.50)     | -1.02  | 0.308 |
| Antithrombin              |                      |                      |        |       |
| III[M(Q1,Q3),%]           | 95.10 (87.35,103.85) | 93.76 (86.65,101.30) | -1.112 | 0.266 |

---
